# Supplementary material for: Diversification of the Salmonella Fimbriae: A Model of Macro- and Microevolution
Source: PLoS One. 2012 Jun 12;7(6):e38596. doi: 10.1371/journal.pone.0038596 (PMC3373541; doi:10.1371/journal.pone.0038596)
Supplement: Table S7 — GenBank accession numbers for Salmonella fimbrial adhesin genes that were not from genomic data. (XLS) [file pone.0038596.s014.xls]

## Sheet: Supplemental Table S7
Adhesin genes	GenBank Acession unmber
fimH	HQ329932 to HQ329932	HQ329797 to HQ329810	HQ329919	HQ329920	EF116600	EF091152	EF029034	DQ862470	DQ862471	AY486388	AY486389	AY159806
safD	BD283699	AJ311844
sdiD	FN298495
sdbD	FN298495
pehD	FN298495
tcfD	AJ242964	BD283700
